## **Multi-session visual cortex transcranial random noise stimulation in adults with amblyopia**

Richard Donkor, Andrew E. Silva, Caroline Teske, Margaret Wallis-Duffy, Benjamin Thompson  
*Department of Optometry and Vision Science, University of Waterloo, Canada*

Corresponding Author

Benjamin Thompson

200 University Avenue West,

Waterloo, Ontario, N0B 2T0

ben.thompson@uwaterloo.ca

**Purpose:** We tested the hypothesis that five daily sessions of visual cortex transcranial random noise stimulation would improve contrast sensitivity, crowded and uncrowded visual acuity in adults with amblyopia.

**Methods:** Nineteen adults with amblyopia ( $44.2 \pm 14.9$  yrs, 10 female) were randomly allocated to active or sham tRNS of the visual cortex (active,  $n = 9$ ; sham,  $n = 10$ ). tRNS was delivered for 25 minutes across five consecutive days. Monocular contrast sensitivity, uncrowded and crowded visual acuity were measured before, during, 5 minutes and 30 minutes post stimulation on each day.

**Results:** Active tRNS significantly improved contrast sensitivity for both amblyopic and fellow eyes whereas sham stimulation had no effect. An analysis of the day by day effects revealed large within session improvements on day 1 for the active group that waned across subsequent days. No long-lasting changes in baseline contrast sensitivity were observed in the active group. The uncrowded visual acuity measurements followed the same trend, but differences in baseline uncrowded visual acuity between the two groups prevent definitive conclusions. No effect of tRNS was observed for crowded visual acuity.

**Conclusions:** In agreement with previous non-invasive brain stimulation studies using different techniques, tRNS induced short-term contrast sensitivity improvements in adult amblyopic eyes, and the effects may extend to uncrowded visual acuity. However, multiple sessions of tRNS did not lead to enhanced or long-lasting effects. Multi-modal approaches to adult amblyopia treatment that combine non-invasive brain stimulation with other interventions may be required to induce long lasting improvements in visual function.

Keywords: Visual cortex plasticity; amblyopia; contrast sensitivity; visual acuity; non-invasive brain stimulation; transcranial random noise stimulation

## **Introduction**

Amblyopia is a developmental disorder of the visual cortex, with a prevalence of 1-5% [1–3].

Amblyopia causes a wide range of vision deficits [4,5], including a monocular loss of high-contrast visual acuity [6,7] that is particularly pronounced for crowded optotypes [8,9], reduced contrast sensitivity in the affected eye [6,10–12], and impaired or absent stereopsis [13,14].

Amblyopia is also associated with chronic suppression of the affected eye [15,16] that may play a key role in the etiology of the disorder [17].

Amblyopia involves abnormal processing within the primary and extrastriate visual cortex [18] and therefore recovery from amblyopia requires a change in cortical function. Current amblyopia treatments achieve this by directly manipulating visual input to the brain. For example, the most common amblyopia treatment involves the provision of a clear retinal image in the amblyopic eye using refractive correction followed by occlusion of the non-amblyopic eye. This treatment improves amblyopic eye visual acuity, but has drawbacks in terms of compliance [19] and reduced efficacy with increasing age [20].

Transcranial electrical stimulation (tES) refers to a suite of non-invasive neuro-modulation techniques including transcranial direct current stimulation (tDCS), transcranial alternating current stimulation (tACS) and transcranial random noise stimulation (tRNS) that may enhance plasticity in targeted regions of the human brain [21–23], including the visual cortex [24–26]. Currently, tES methods are being investigated as a potential neurorehabilitation tool for disorders including stroke [27–30], chronic pain [31,32] and tinnitus [33,34].

Following early work that reported improved contrast sensitivity in adults with amblyopia after visual cortex transcranial magnetic stimulation [35,36], a number of studies have investigated the application of anodal tDCS to amblyopia. A single session of anodal tDCS improves amblyopic eye contrast sensitivity [37,38], increases visually evoked potential (VEP) amplitudes induced by stimuli presented to the amblyopic eye [38], and balances the response to inputs from each eye within visual cortex [37]. Furthermore, anodal tDCS enhances the effect of perceptual learning (PL) in adults with amblyopia [26] and recent studies have revealed that visual acuity, detection thresholds, and stereopsis improve in mature amblyopic rats following anodal tDCS [39–41]. One potential mechanism for anodal tDCS effects in adults with amblyopia is a reduction in GABA-mediated inhibition [42] within the visual cortex. GABA has been associated with interocular suppression in strabismic cats [43] and may act as a “break” on visual cortex plasticity [44].

A recently developed tES technique, tRNS, involves an alternating current that randomly changes in frequency and amplitude [45]. tRNS may have larger effects on cortical activity than other tES protocols. For example, tRNS induced significantly greater improvements in tinnitus symptoms [33] and larger increases in motor evoked potential amplitude (MEP) [21] compared to either tDCS or tACS. Furthermore, visual cortex tRNS enhanced visual perceptual learning in adults with normal vision to a greater extent than anodal tDCS [46]. Potential mechanisms for these effects include an acute enhancement of the signal-to-noise ratio within the visual cortex due to stochastic resonance [47–49] and longer-lasting alterations in neural membrane function due to repetitive opening and closing of sodium channels [50].

Building on prior amblyopia tES studies, we tested the hypothesis that five daily sessions of visual cortex tRNS would lead to improved amblyopic eye contrast sensitivity, crowded and uncrowded amblyopic eye visual acuity in adult patients. We employed a single-blind, between subjects, randomized, sham-controlled study design and observed significant improvements for each of our outcome measures in the active tRNS group compared to the sham-stimulation (placebo) group. These effects did not persist at follow-up 28 days after the last stimulation session.

## **Methods and materials**

### ***Participants***

Nineteen healthy adults with amblyopia (mean age  $44.2 \pm 14.9$  yrs) participated (**Table 1**). Participants were randomly assigned to the active tRNS group or to the control (sham) group. Amblyopia was defined as reduced best corrected visual acuity ( $> +0.3$  logMAR) in one eye in the absence of ocular pathology and at least a 0.2 logMAR acuity difference between the eyes. Anisometropia was defined as a difference in spherical equivalent between the two eyes of  $\geq 0.50$  Diopters (D), or a difference of astigmatism in any meridian  $\geq 1.50$  D [51]. Initial visual acuity was measured using an M&S Snellen chart. Inclusion criteria were: (i) presence of strabismic and/or anisometropic amblyopia; (ii) 0.0 logMAR visual acuity or better in the fellow eye (FE). Exclusion criteria [52–55] were: (i) presence of a scalp skin condition that contraindicated tRNS; (ii) history of neurological or psychiatric disorders, such as seizures; (iii) current medication for the treatment of neurological or psychiatric disorders; (iv) a history of brain injury; (v) implanted medical devices. Data were collected within a clinical optometric practice to provide a real-world clinical setting. Potential participants were contacted following a

search of the clinic's patient database. Interested participants completed telephone screening to determine eligibility. The experimental procedures were approved by the Ethics Review Board of the University of Waterloo, Canada and were consistent with the declaration of Helsinki. Written informed consent was obtained from all participants. All participants were remunerated for their time. Two subjects were excluded due to loss of follow up after first day (Figure 1).

**Table 1:** Clinical details of the study participants (**AG:** Active group; **SG:** Sham group; **AME:** Amblyopic eye; **FFE:** Fellow fixating eye; **ADD:** Near power addition; **Aniso:** Anisometropia; **Strab:** Strabismus; **Mixed:** Anisometropia & Strabismus; **M:** Male; **F:** Female).

| Identification | Age/sex | Patching | Type of amblyopia | Stereoaucuity | Visual acuity (logMAR) |       | Current refraction |                    | ADD   |
|----------------|---------|----------|-------------------|---------------|------------------------|-------|--------------------|--------------------|-------|
|                |         |          |                   |               | AME                    | FFE   | AME                | FFE                |       |
| AG1            | 27/M    | Yes      | Mixed             | <800          | +1.40                  | 0.00  | +2.0 -0.50 x 155   | +0.50 DS           |       |
| AG2            | 20/M    | Yes      | Aniso             | 400           | +0.50                  | -0.05 | +1.00 -1.50 x 175  | Plano              |       |
| AG3            | 37/M    | Yes      | Aniso             | <800          | +0.30                  | 0.00  | -1.00 -1.00 x 100  | -0.25 -2.50 x 090  |       |
| AG4            | 45/F    | Yes      | Aniso             | 200           | +0.30                  | 0.00  | +2.75 -0.75 x 080  | +2.00 -0.25 x 159  | +1.50 |
| AG5            | 59/M    | No       | Aniso             | <800          | +0.70                  | 0.00  | +8.25 DS           | +8.25 -1.25 x 105  | +2.50 |
| AG6            | 41/F    | Yes      | Mixed             | <800          | +0.50                  | 0.00  | +2.00 DS           | +0.25 -3.75 x 179  | +0.75 |
| AG7            | 46/M    | No       | Aniso             | <800          | +0.40                  | 0.00  | +0.75 DS           | +4.25 -0.50 x 165  |       |
| AG8            | 52/F    | No       | Aniso             | 400           | +0.70                  | 0.00  | +0.50 -0.50 x 175  | +2.00 -0.50 x 075  | +2.25 |
| AG9            | 21/F    | No       | Aniso             | 60            | +0.50                  | +0.10 | +0.50 -4.00 x 180  | Plano              |       |
| SG1            | 51/F    | Yes      | Mixed             | <800          | +0.30                  | -0.09 | +3.25 -0.50 x 165  | Plano              | +2.25 |
| SG2            | 21/F    | No       | Aniso             | <800          | +0.30                  | 0.00  | +4.50 -2.50 x 180  | +3.50 - 1.50 x 167 |       |
| SG3            | 58/F    | No       | Aniso             | <800          | +0.50                  | 0.00  | +4.50 -3.75 x 176  | +3.75 -3.75 x 176  | +2.25 |
| SG4            | 58/M    | Yes      | Aniso             | 400           | +0.30                  | 0.00  | +4.00 -0.25 x 180  | +1.50 -0.50 x 180  | +2.75 |
| SG5            | 52/F    | No       | Aniso             | 200           | +0.40                  | 0.00  | -2.50 -0.50 x 155  | -1.50 DS           |       |
| SG6            | 19/M    | No       | Aniso             | <800          | +0.30                  | 0.00  | +2.25 DS           | +0.75 DS           |       |
| SG7            | 55/M    | No       | Strab             | <800          | +0.30                  | 0.00  | +1.75 -0.75 x 085  | +1.75 -0.75 x 090  | +2.00 |
| SG8            | 49/M    | No       | Strab             | 100           | +0.30                  | 0.00  | +1.75 DS           | +1.50 DS           |       |
| SG9            | 24/M    | No       | Mixed             | <800          | +0.30                  | 0.00  | +8.25 -2.00 x 160  | +6.50 -1.25 x 0.40 |       |
| SG10           | 58/F    | No       | Strab             | <800          | +0.50                  | 0.00  | +4.50 -0.25 x 176  | +3.50 -0.50 x 165  | +2.75 |

## Procedure

A single-blind, sham controlled, between-subjects design was adopted. Randomization was conducted by an experimenter who was not involved in data collection or eligibility assessment using a random number generator. Randomization occurred after participants had met the eligibility criteria and completed study enrolment. Participants completed 5 consecutive daily stimulation sessions and a follow-up session 28 days after the final stimulation session.

### *Transcranial Random Noise Stimulation*

Subjects either received tRNS (2.0 mA, current density: 0.08 mA/cm, frequency range 0.1-640 Hz) or placebo (sham) stimulation of the primary visual cortex for 25 min over 5 consecutive days. Stimulation was delivered using a DC-stimulation MC device (Eldith, NeuroConn GmbH, Germany). The stimulation was delivered via a pair of saline-soaked surface sponge electrodes (5 cm x 5 cm, 25 cm<sup>2</sup>) placed at Cz (reference) and Oz (stimulating electrode)[56], as determined by the international 10/20 electroencephalogram system. The AC current was initially ramped up to a maximum of 2mA over 30 s and ramped down to 0mA over 30 s at the end of the stimulation session. During sham stimulation, the 30 s ramp-up was immediately followed by the ramp-down out [57]. Our between subjects design and use of participants entirely naïve to non-invasive brain stimulation ensured that participants remained masked to their treatment allocation. Our application of tRNS conformed to tDCS safety guidelines [55,58].

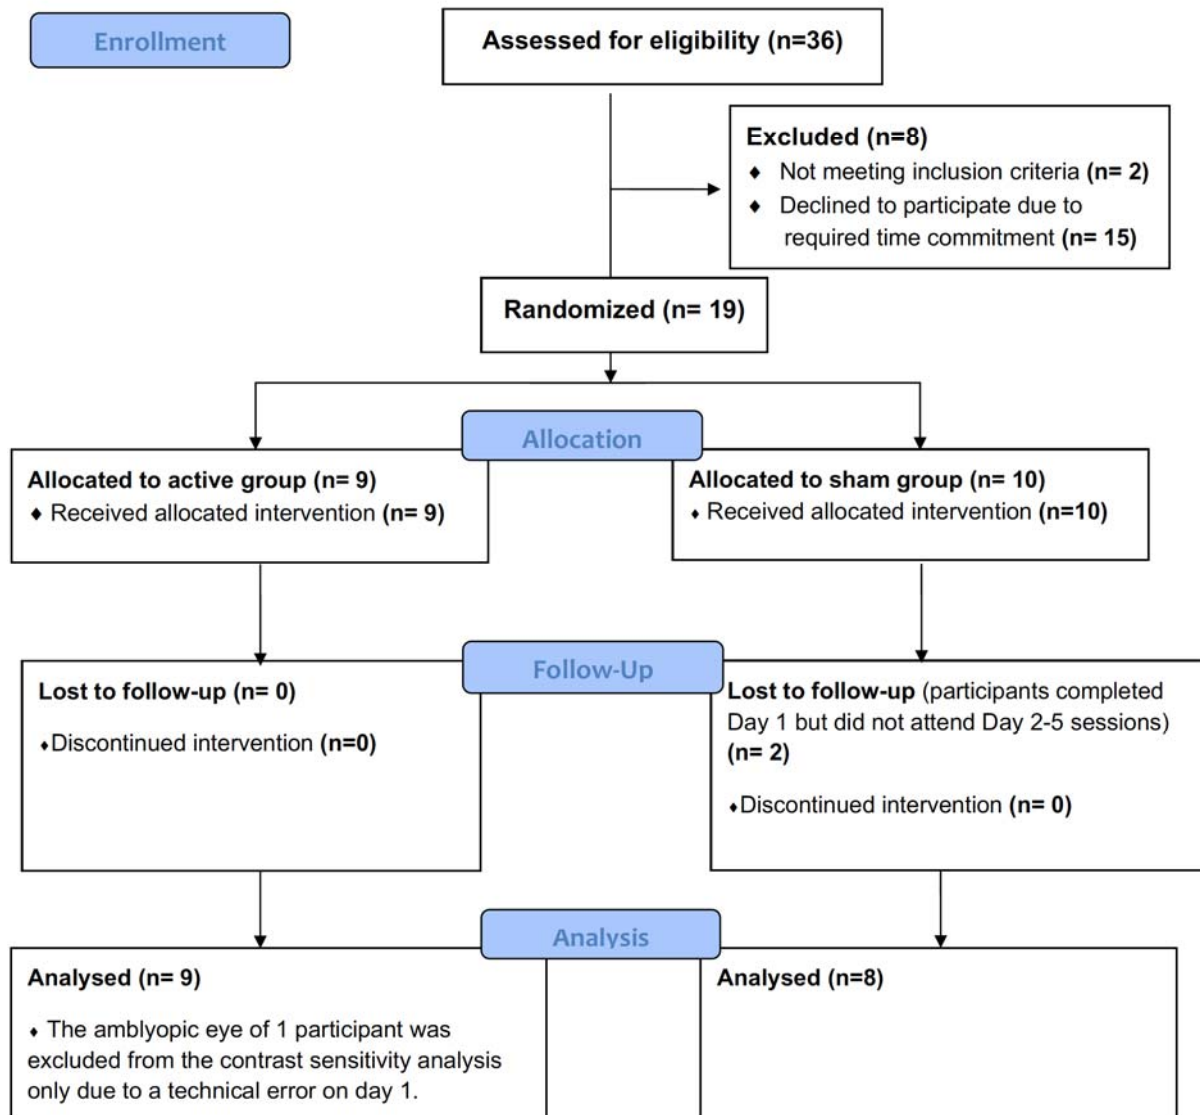

**Figure 1.** CONSORT flow diagram for the study

### *Visual Function Measurements*

Monocular contrast sensitivity and visual acuity (both crowded and uncrowded) were measured before, during, 5 min post, and 30 min post stimulation on each stimulation day (**Figure 2**). All measurements were made using Landolt-C optotypes presented using the Freiburg Vision Test ('FrACT') [59,60] software package on a MacBook Pro (Version 10.13.6, 13-inch, 2.7 GHz,



2560 x 1600). The Landolt-C optotype was presented at 8 possible orientations and viewed from 3 m. Participants identified the gap orientation using button presses. Trials were self-paced with a maximum display time of 30 s. A Bayesian adaptive (“Best PET”) algorithm controlled optotype size for the crowded and uncrowded visual acuity threshold measurements and optotype contrast for the contrast sensitivity threshold measurement. Each threshold measurement lasted approximately 3 min. Landolt-C gap width was fixed at 30 arcmin for the non-amblyopic eye and 100 arcmin for the amblyopic eye during the contrast sensitivity measures. Crowded optotypes were surrounded by a circle. Both the fellow eye and amblyopic eye were tested monocularly with the fellow tested first within each block. Uncrowded visual acuity was tested first within each block followed by crowded visual acuity and contrast sensitivity.

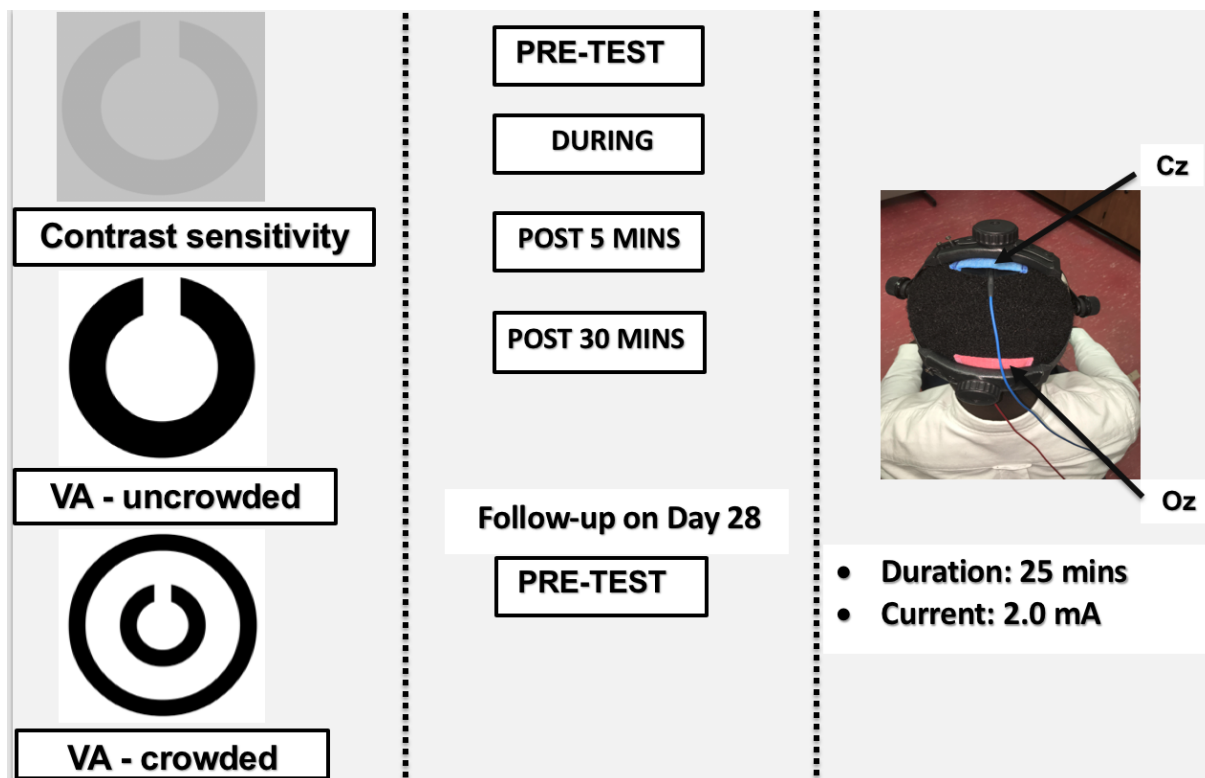

**Figure 2.** Testing and stimulation protocol. Each measurement was recorded before stimulation (pre-test), during stimulation, 5 min after stimulation (Post 5 mins) and 30 min after stimulation

(Post 30 mins) for 5 consecutive days (middle column). Baseline (pre-test) measurements were recorded again for each eye 28 days (Day 28) after the last stimulation session. Stimulation was delivered for 25 mins at 2.0mA (right column). Active and reference electrodes were placed at Oz and Cz respectively. VA = visual acuity.

### ***Data Analysis***

Statistical analyses were performed using SPSS 19 (IBM Corp., Armonk, NY). Visual acuities were recorded in logMAR units. Contrast sensitivity was recorded in log units. To test for tRNS effects within the 5 stimulation sessions, a mixed-effects analysis of variance (ANOVA) with a between-subjects factor of Group (active vs sham), a within-subjects factor of Day (day 1-5), and a within-subjects factor of Time (baseline, during, post 5 and post 30 mins) was conducted for each measurement type for each eye separately. Planned pairwise comparisons (least significance difference test) between baseline and all other timepoints were examined for each day. In addition, to assess whether tRNS had cumulative or long-term effects on visual function, a mixed ANOVA with factors of Group (active vs sham) and Baseline (baseline day 1, baseline day 2, baseline day 3, baseline day 4, baseline day 5, baseline day 28) was conducted for each outcome measure for each eye. Pairwise comparisons across baselines were conducted to explore significant interaction effects. A significance threshold of  $p < 0.05$  was adopted for all analyses.

### **Results**

There were no adverse effects of tRNS. The majority of the participants in both the active and sham groups reported mild tingling sensations under the electrodes. Two participants in the sham group withdrew from the study after day 1 due to the time commitment required by the study and were excluded from the analysis (**Figure 1**). A technical error prevented an accurate amblyopic

eye contrast sensitivity measurement on day 1 for one participant in the active group. This participant was excluded from the amblyopic eye contrast sensitivity analysis only (Figure 1).

### ***Contrast Sensitivity***

For the amblyopic eyes (Figure 3 - upper panel), there was a significant interaction between Group and Time,  $F_{3,42} = 4.6$ ,  $p = .007$ ,  $\eta_p^2 = .249$ . No other omnibus main effects or interactions were significant. Planned pairwise comparisons between baseline and all other timepoints were examined for the active and sham groups for each day. During day 1, the active group exhibited a significant improvement in contrast sensitivity from baseline for all post-test measurements (during:  $p = 0.02$ ; post 5 min:  $p = .026$ ; and post 30 min:  $p = 0.02$ ). During day 2, the active group exhibited a significant difference between baseline and the post 5 min measurement only ( $p = .043$ ). No significant differences between baseline and any post-test were found for days 3-5. No significant differences between baseline and any post-test were found within the sham group for any day.

For the fellow eyes (Figure 3 - lower panel), there was a significant interaction between Group and Time,  $F_{3,45} = 3.271$ ,  $p = .030$ ,  $\eta_p^2 = .179$ . No other omnibus main effects or interactions were significant. During day 1, the active group exhibited a significant improvement in contrast sensitivity from baseline for the post 5 min ( $p = 0.016$ ) and post 30 min ( $p = 0.017$ ) measurements. No significant differences between baseline and any post-test were found for days 2-5. No significant differences between baseline and any post-test were found within the sham group for any day.

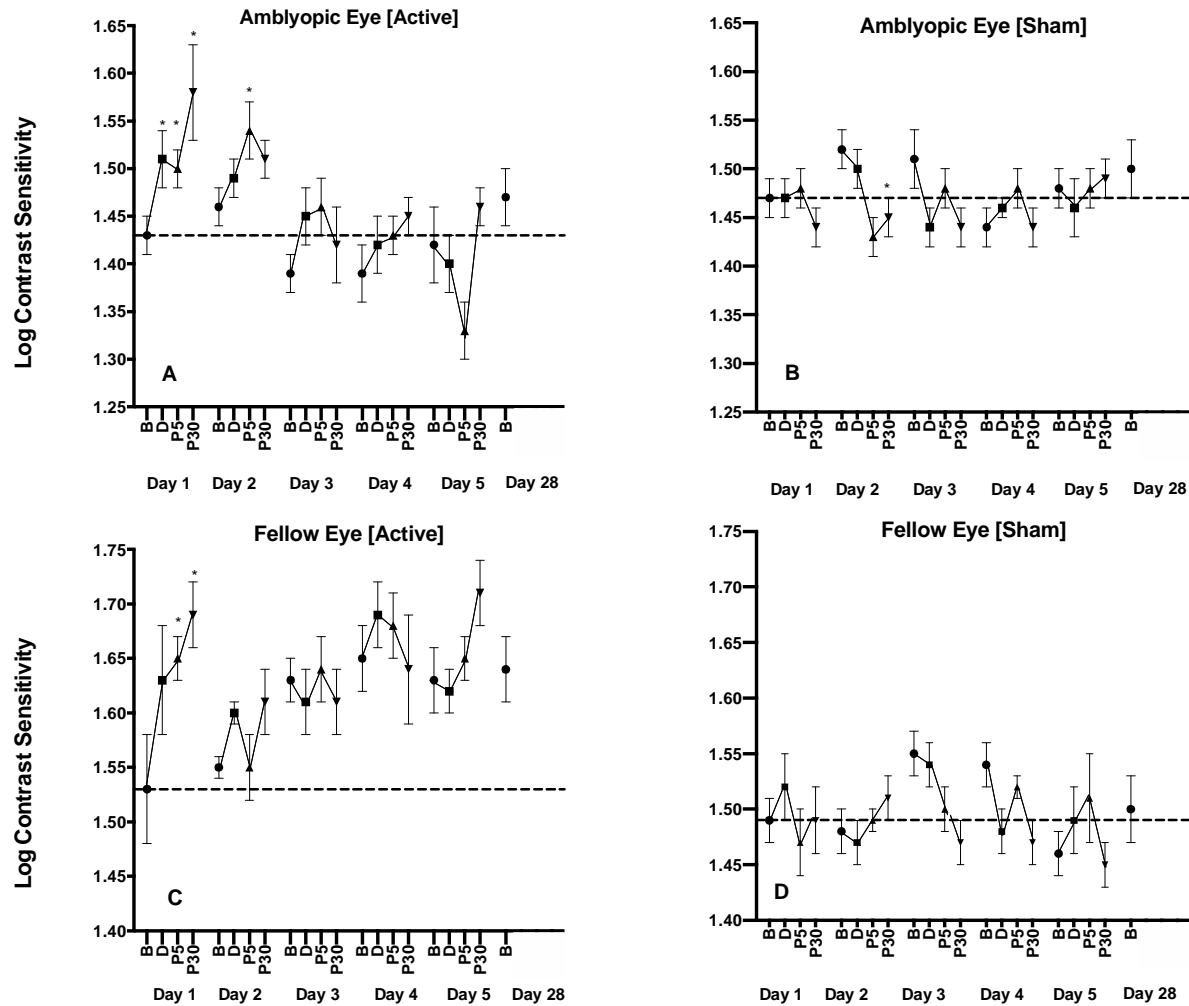

Figure 3: The effects of tRNS on contrast sensitivity during each daily session and at the day 28 follow-up visit. Data are shown separately for the amblyopic (top row) and fellow (bottom row) eyes and for the active (left column) and control (right column) groups at baseline (B) and during (D), 5 min (P5) and 30 min (P30) post tRNS. \*Statistically significant difference from baseline ( $p < 0.05$ ). Error bars show within-subject standard error of the mean (SEM). The dashed horizontal lines represents the mean before-stimulation threshold on day 1. Larger y-axis values indicate better contrast sensitivity.

## Uncrowded Visual Acuity

For the amblyopic eyes (Figure 4 - upper panel), there was a significant interaction between Group and Time ( $F_{3,45} = 3.121$ ;  $p = .035$ ,  $\eta_p^2 = .172$ ). No other omnibus main effects or interactions were significant. During day 1, the active group exhibited a significant improvement in uncrowded visual acuity from baseline for all post-test measurements (during:  $p = .013$ ; post 5:  $p = .016$ ; post 30:  $p = .003$ ). During days 2 and 3, the active group exhibited a significant difference between baseline and only the post 5 min measurement (day 2:  $p = .009$ , day 3:  $p = .031$ ). No significant differences between baseline and any post-test were found during days 4 and 5. No significant difference between baseline and any post-test was found within the sham group for any day. By chance, there was a substantial difference in baseline uncrowded Landolt-C visual acuity between the active and sham group (compare the dashed lines in Figure 4, upper panels).

For the fellow eyes (Figure 4 - lower panel), there was a significant interaction between Group and Time,  $F_{3,45} = 3.600$ ;  $p = .020$ ,  $\eta_p^2 = .194$ . No other omnibus main effects or interactions were significant. During day 1, the active group exhibited a significant improvement in contrast sensitivity from baseline for the post 5 ( $p = 0.004$ ) and post 30 ( $p = 0.007$ ) min measurements. No significant differences between baseline and any post-test were found for days 2-5. No significant differences between baseline and any post-test were found within the sham group for any day.

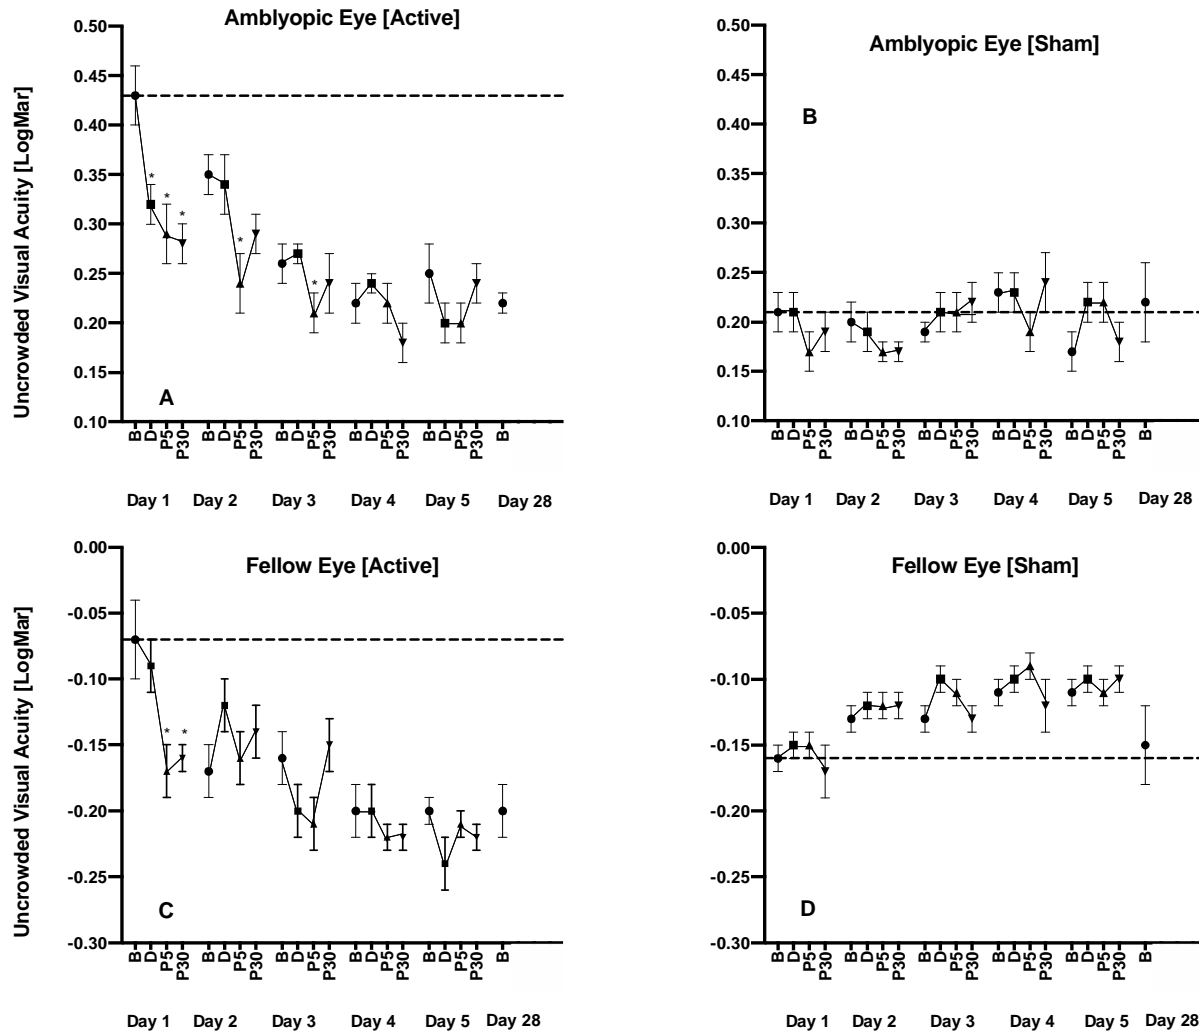

Figure 4: The effects of tRNS on uncrowded visual acuity during each daily session and at the day 28 follow-up visit. Data are shown as in Figure 3. Lower (smaller/more negative) y-axis values indicate better uncrowded visual acuity.

### *Crowded Visual Acuity*

For the amblyopic eyes (Figure 5, upper panel), there were no significant main effects or interactions (all  $p > 0.05$ ). No significant changes from baseline were observed for any day for

any group. As for uncrowded visual acuity, there was a substantial difference in baseline performance between the two groups that occurred by chance during randomization.

For the fellow eyes (Figure 5, lower panel), there was a significant interaction between Group and Time,  $F_{3,45} = 6.324$ ;  $p = .001$ ,  $\eta_p^2 = .297$ . No other omnibus main effects or interactions were significant. During day 1, the active group exhibited a significant improvement in crowded acuity from baseline for the post 5 ( $p = 0.023$ ) and post 30 ( $p = 0.019$ ) min measurements. During days 3 and 5, the active group exhibited a significant improvement in crowded acuity from baseline to post 5 min ( $p = .009$ ) and post 30 min ( $p = .022$ ) respectively. No significant differences between baseline and any post-test were found for days 2 and 4. No significant differences between baseline and any post-test were found for the sham group.

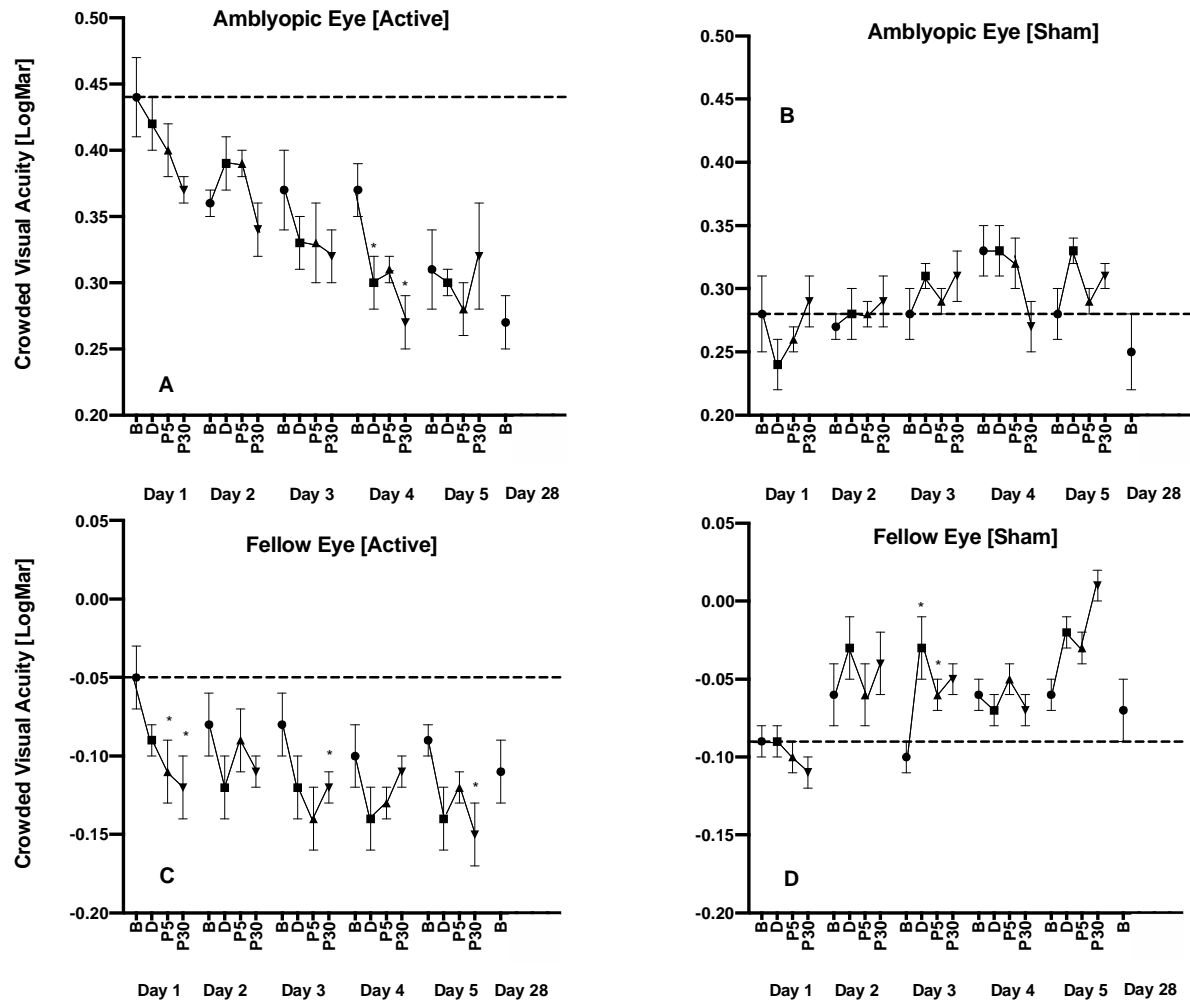

Figure 5: The effects of tRNS on crowded visual acuity during each daily session and at the day 28 follow-up visit. Data are shown as in Figure 3. Lower (smaller/more negative) y-axis values indicate better crowded visual acuity.

### *Cumulative and long-term effects of tRNS*

For the amblyopic eyes, there was a significant interaction between Group and Baseline for uncrowded visual acuity ( $F_{5,65} = 3.372$ ;  $p = .009$ ,  $\eta_p^2 = .206$ ). Pairwise comparisons for the active group revealed a significant difference between the day 1 baseline and the day 3 ( $p =$



0.010), day 4 ( $p < 0.001$ ), day 5 ( $p = 0.012$ ), and day 28 ( $p = 0.001$ ) baselines. However, no pairwise comparisons were significant for the sham group. There were no significant interactions for amblyopic eye contrast sensitivity or crowded visual acuity measurements or any of the fellow eye measurements.

## **Discussion**

Our results partially supported our experimental hypothesis that five daily sessions of visual cortex tRNS would improve amblyopic eye contrast sensitivity as well as crowded and uncrowded visual acuity in adult patients. We observed tRNS-induced improvements in contrast sensitivity and uncrowded visual acuity relative to the sham group for both amblyopic and fellow eyes. Crowded visual acuity improved for the fellow but not the amblyopic eyes. Across all outcome measures, pairwise comparisons revealed that acute tRNS effects were statistically significant on days 1 and 2 but became non-significant for later sessions. Only amblyopic eye uncrowded visual acuity exhibited a lasting effect of tRNS at follow-up. Our discussion will focus primarily on the results for contrast sensitivity because initial baseline performance was matched between the groups. There were pronounced between-group baseline differences for amblyopic eye uncrowded and crowded visual acuity that occurred by chance during the randomization procedure (randomization occurred before baseline measures were conducted). The difference in baseline performance for the acuity outcome measures make it difficult to properly segregate tRNS effects from task learning effects.

## **tRNS-induced improvements in contrast sensitivity**

Our observation that visual cortex tRNS improved amblyopic eye contrast sensitivity is consistent with a growing literature reporting improved contrast sensitivity, visual acuity, stereopsis, and an enhanced cortical response to amblyopic eye inputs following non-invasive visual cortex stimulation in adults with amblyopia [26,35–38,61,62]. Two potential mechanisms have been proposed for tRNS effects: stochastic resonance and changes in the resting membrane potential [48,63]. Stochastic resonance refers to an improvement in signal to noise ratio when a certain amount of noise (in this case neural noise induced by tRNS) is added to non-linear systems [47]. A number of psychophysical studies have provided compelling evidence that stochastic resonance occurs during visual cortex tRNS [24,64–66]. It is possible that the during-stimulation improvements we observed on day 1 for amblyopic eye contrast sensitivity were due to stochastic resonance. However, tRNS aftereffects (i.e. effects that outlast the duration of stimulation) cannot easily be explained by stochastic resonance. Rather, aftereffects may be related to repeated opening and closing of sodium channels during stimulation that causes neural membrane depotentialization and increased cortical excitability. In agreement with this theory, blocking sodium channels appears to reduce the aftereffect of tRNS on motor cortex excitability [67].

A previous study [36] reporting improved amblyopic eye contrast sensitivity following both excitatory and inhibitory visual cortex rTMS proposed a mechanism linked to cortical homeostasis. According to this hypothesis, excitatory stimulation has a more pronounced effect on weakly activated/suppressed neural populations whereas inhibitory stimulation has a greater effect on strongly activated populations. Therefore, both excitatory and inhibitory stimulation are

capable of restoring a level of homeostasis to the amblyopic visual cortex by reducing the difference in activation between amblyopic eye dominated neurons (weak activation/suppression) and fellow eye dominated neurons (strong activation) [37]. This, in turn, reduces suppression and/or the relative attenuation of amblyopic-eye-driven neural activity. It is plausible that the excitatory tRNS we employed in this study acts through a homeostatic mechanism.

We also observed improved fellow eye contrast sensitivity in the tRNS group relative to the sham group. Non-invasive visual cortex stimulation studies have reported varying fellow eye effects. Studies using inhibitory stimulation protocols (1 Hz rTMS and continuous theta burst stimulation; cTBS) have reported reduced fellow eye contrast sensitivity [35, 36] whereas those using excitatory protocols (anodal tDCS and tRNS) [24,38], including the present study, observed improvements. This pattern of results is consistent with the homeostasis hypothesis which predicts relatively impaired fellow eye function following inhibitory stimulation and does not rule out improved fellow eye function following excitatory stimulation. This is because excitatory effects may still occur within neuronal populations dominated by the fellow eye, just to a lesser extent than those dominated by the amblyopic eye.

### **Successive and cumulative tRNS effects on contrast sensitivity**

A day by day analysis of the contrast sensitivity data revealed that tRNS effects were pronounced for both eyes on day 1. However, the within-session tRNS effects waned across sessions, becoming non-significant by day 3 for the amblyopic eye and by day 2 for the fellow eye. This reduction in within-session tRNS effects was accompanied by stable session to session

baseline performance indicating the absence of a cumulative tRNS effect on contrast sensitivity.

The waning of within-session effects is consistent with Clavagnier et al's (2013) study of repeated cTBS sessions in amblyopia, however cTBS did induce cumulative effects that improved baseline performance across sessions. One possible explanation for the waning of within-session tRNS effects and the absence of a cumulative effect on contrast sensitivity relates to stimulation intensity. The relationship between tRNS intensity and visual function improvement during stimulation is an "inverted U", whereby stimulation that is weaker or stronger than an optimum level has limited effects [48,49]. Lasting changes in cortical excitability induced by prior sessions of tRNS might shift the optimal stimulation intensity towards lower levels, causing a waning of tRNS effects across sessions if stimulation intensity remains constant. If this is the case, tapering stimulation intensity across sessions would be a possible solution.

### **tRNS effects of crowded and uncrowded visual acuity**

It is not possible to draw strong conclusions relating to the amblyopic eye datasets for crowded and uncrowded visual acuity because there were large between-group differences in baseline performance that occurred by chance. However, baseline group differences were minimal for the fellow eye datasets and the results followed those for contrast sensitivity very closely; significant differences between groups that were characterized by within-session improvements early in the experiment and a gradual waning of tRNS effects. This suggests that transient tRNS effects occur for a range of visual functions.

## Conclusions

tRNS can induce short-term contrast sensitivity improvements in adult amblyopic eyes, however multiple sessions of tRNS do not lead to enhanced or long-lasting effects. In agreement with previous non-invasive brain stimulation studies, these results demonstrate considerable short-term plasticity within the visual cortex of human adults with amblyopia. The combination of tRNS and perceptual learning has recently been reported to enhance the transfer of learning to non-trained visual tasks when compared to perceptual learning alone in adults with amblyopia [24]. Similarly, it has been demonstrated that anodal tDCS enhances the effects of binocular treatment on stereopsis in adults with amblyopia [26]. Multi-modal approaches to adult amblyopia treatment that combine non-invasive brain stimulation with other interventions represent a promising area for continued research.

## Acknowledgements

This work was supported by CIHR grant 390283, CFI grant 34095 and NSERC grants RPN-05394 and RGPAS-477166 to BT.

## References

- [1] Attebo K, Mitchell P, Cumming R, Smith W, Jolly N, Sparkes R. Prevalence and cause of amblyopia in an adult population. *Ophthalmology* 1998. doi:10.1016/S0161-6420(98)91862-0.
- [2] Pai ASI, Rose KA, Leone JF, Sharbini S, Burlutsky G, Varma R, et al. Amblyopia prevalence and risk factors in Australian preschool children. *Ophthalmology* 2012. doi:10.1016/j.ophtha.2011.06.024.

- [3] Webber AL, Wood J. Amblyopia: Prevalence, natural history, functional effects and treatment. *Clin Exp Optom* 2005. doi:10.1111/j.1444-0938.2005.tb05102.x.
- [4] Hamm LM, Black J, Dai S, Thompson B. Global processing in amblyopia: a review. *Front Psychol* 2014;5:583. doi:10.3389/fpsyg.2014.00583.
- [5] Asper L, Crewther D, Crewther SG. Strabismic amblyopia: Part 1: Psychophysics. *Clin Exp Optom* 2000. doi:10.1111/j.1444-0938.2000.tb04892.x.
- [6] McKee SP, Levi DM, Movshon JA. The pattern of visual deficits in amblyopia. *J Vis* 2003;3:5. doi:10.1167/3.5.5.
- [7] Levi DM, Klein S. Hyperacuity and amblyopia. *Nature* 1982. doi:10.1038/298268a0.
- [8] Levi DM, Klein SA. Vernier acuity, crowding and amblyopia. *Vision Res* 1985. doi:10.1016/0042-6989(85)90208-1.
- [9] Stager DR, Everett ME, Birch EE. Comparison of crowding bar and linear optotype acuity in amblyopia. *Am Orthopt J* 1990.
- [10] Bradley A, Freeman RD. Contrast sensitivity in anisometric amblyopia. *Investig Ophthalmol Vis Sci* 1981.
- [11] Kiorpes L, Kiper DC, Movshon JA. Contrast sensitivity and vernier acuity in amblyopic monkeys. *Vision Res* 1993. doi:10.1016/0042-6989(93)90107-8.
- [12] Hess RF, Howell ER. The threshold contrast sensitivity function in strabismic amblyopia: Evidence for a two type classification. *Vision Res* 1977. doi:10.1016/0042-6989(77)90009-8.
- [13] Birch EE. Amblyopia and binocular vision. *Prog Retin Eye Res* 2013. doi:10.1016/j.preteyeres.2012.11.001.
- [14] Levi DM, Knill DC, Bavelier D. Stereopsis and amblyopia: A mini-review. *Vision Res*

2015. doi:10.1016/j.visres.2015.01.002.
- [15] Black JM, Hess RF, Cooperstock JR, To L, Thompson B. The Measurement and Treatment of Suppression in Amblyopia. *J Vis Exp* 2012:e3927–e3927. doi:10.3791/3927.
- [16] Li J, Thompson B, Lam CSY, Deng D, Chan LYL, Maehara G, et al. The role of suppression in amblyopia. *Invest Ophthalmol Vis Sci* 2011;52:4169–76. doi:10.1167/iovs.11-7233.
- [17] Hess RF, Thompson B. Amblyopia and the binocular approach to its therapy. *Vision Res* 2015;114:4–16. doi:10.1016/j.visres.2015.02.009.
- [18] Kiorpes L, Daw N. Cortical correlates of amblyopia. *Vis Neurosci* 2018;35:E016. doi:10.1017/S0952523817000232.
- [19] Loudon SE, Polling JR, Simonsz HJ. Electronically measured compliance with occlusion therapy for amblyopia is related to visual acuity increase. *Graefe's Arch Clin Exp Ophthalmol* 2003. doi:10.1007/s00417-002-0570-z.
- [20] Holmes JM, Lazar EL, Melia BM, Astle WF, Dagi LR, Donahue SP, et al. Effect of age on response to amblyopia treatment in children. *Arch Ophthalmol* 2011. doi:10.1001/archophthalmol.2011.179.
- [21] Inukai Y, Saito K, Sasaki R, Tsuiki S, Miyaguchi S, Kojima S, et al. Comparison of Three Non-Invasive Transcranial Electrical Stimulation Methods for Increasing Cortical Excitability. *Front Hum Neurosci* 2016;10:668. doi:10.3389/fnhum.2016.00668.
- [22] Paulus W. Transcranial electrical stimulation (tES - tDCS; tRNS, tACS) methods. *Neuropsychol Rehabil* 2011;21:602–17. doi:10.1080/09602011.2011.557292.
- [23] Terney D, Chaieb L, Moliadze V, Antal A, Paulus W. Increasing Human Brain Excitability by Transcranial High-Frequency Random Noise Stimulation. *J Neurosci*

2008;28.

- [24] Moret B, Camilleri R, Pavan A, Lo Giudice G, Veronese A, Rizzo R, et al. Differential effects of high-frequency transcranial random noise stimulation (hf-tRNS) on contrast sensitivity and visual acuity when combined with a short perceptual training in adults with amblyopia. *Neuropsychologia* 2018;114:125–33.  
doi:10.1016/j.neuropsychologia.2018.04.017.
- [25] Camilleri R, Pavan A, Campana G. The application of online transcranial random noise stimulation and perceptual learning in the improvement of visual functions in mild myopia. *Neuropsychologia* 2016;89:225–31.  
doi:10.1016/j.neuropsychologia.2016.06.024.
- [26] Spiegel DP, Li J, Hess RF, Byblow WD, Deng D, Yu M, et al. Transcranial Direct Current Stimulation Enhances Recovery of Stereopsis in Adults With Amblyopia. *Neurotherapeutics* 2013;10:831–9. doi:10.1007/s13311-013-0200-y.
- [27] Schlaug G, Renga V, Nair D. Transcranial direct current stimulation in stroke recovery. *Arch Neurol* 2008;65:1571–6. doi:10.1001/archneur.65.12.1571.
- [28] Kubis N. Non-Invasive Brain Stimulation to Enhance Post-Stroke Recovery. *Front Neural Circuits* 2016;10:56. doi:10.3389/fncir.2016.00056.
- [29] Norise C, Hamilton RH. Non-invasive Brain Stimulation in the Treatment of Post-stroke and Neurodegenerative Aphasia: Parallels, Differences, and Lessons Learned. *Front Hum Neurosci* 2017;10:1–16. doi:10.3389/fnhum.2016.00675.
- [30] O’Brien AT, Bertolucci F, Torrealba-Acosta G, Huerta R, Fregni F, Thibaut A. Non-invasive brain stimulation for fine motor improvement after stroke: a meta-analysis. *Eur J Neurol* 2018. doi:10.1111/ene.13643.



- [31] Hu X-S, Fisher CA, Munz SM, Toback RL, Nascimento TD, Bellile EL, et al. Feasibility of Non-invasive Brain Modulation for Management of Pain Related to Chemoradiotherapy in Patients with Advanced Head and Neck Cancer. *Front Hum Neurosci* 2016;10:466. doi:10.3389/fnhum.2016.00466.
- [32] Palm U, Chalah MA, Padberg F, Al-Ani T, Abdellaoui M, Sorel M, et al. Effects of transcranial random noise stimulation (tRNS) on affect, pain and attention in multiple sclerosis. *Restor Neurol Neurosci* 2016;34:189–99. doi:10.3233/RNN-150557.
- [33] Vanneste S, Fregni F, De Ridder D. Head-to-head comparison of transcranial random noise stimulation, transcranial AC stimulation, and transcranial DC stimulation for tinnitus. *Front Psychiatry* 2013;4. doi:10.3389/fpsyt.2013.00158.
- [34] Pal N, Maire R, Stephan MA, Herrmann FR, Benninger DH. Transcranial Direct Current Stimulation for the Treatment of Chronic Tinnitus: A Randomized Controlled Study. *Brain Stimul* 2015;8:1101–7. doi:10.1016/j.brs.2015.06.014.
- [35] Clavagnier S, Thompson B, Hess RF. Long lasting effects of daily theta burst rTMS sessions in the human amblyopic cortex. *Brain Stimul* 2013;6:860–7. doi:10.1016/j.brs.2013.04.002.
- [36] Thompson B, Mansouri B, Koski L, Hess RF. Brain Plasticity in the Adult: Modulation of Function in Amblyopia with rTMS. *Curr Biol* 2008;18:1067–71. doi:10.1016/j.cub.2008.06.052.
- [37] Spiegel DP, Byblow WD, Hess RF, Thompson B. Anodal Transcranial Direct Current Stimulation Transiently Improves Contrast Sensitivity and Normalizes Visual Cortex Activation in Individuals With Amblyopia. *Neurorehabil Neural Repair* 2013;27:760–9. doi:10.1177/1545968313491006.

- [38] Ding Z, Li J, Spiegel DP, Chen Z, Chan L, Luo G, et al. The effect of transcranial direct current stimulation on contrast sensitivity and visual evoked potential amplitude in adults with amblyopia. *Sci Rep* 2016;6:19280. doi:10.1038/srep19280.
- [39] Castaño-Castaño S, Garcia-Moll A, Morales-Navas M, Fernandez E, Sanchez-Santed F, Nieto-Escamez F. Transcranial direct current stimulation improves visual acuity in amblyopic Long-Evans rats. *Brain Res* 2017;1657:340–6. doi:10.1016/j.brainres.2017.01.003.
- [40] Castaño-Castaño S, Martinez-Navarrete G, Morales-Navas M, Fernández-Jover E, Sanchez-Santed F, Nieto-Escámez F. Transcranial direct-current stimulation (tDCS) improves detection of simple bright stimuli by amblyopic Long Evans rats in the SLAG task and produces an increase of parvoalbumin labelled cells in visual cortices. *Brain Res* 2019. doi:10.1016/j.brainres.2018.09.039.
- [41] Castaño-Castaño S, Feijoo-Cuaresma M, Paredes-Pacheco J, Morales-Navas M, Ruiz-Guijarro JA, Sanchez-Santed F, et al. tDCS recovers depth perception in adult amblyopic rats and reorganizes visual cortex activity. *Behav Brain Res* 2019. doi:10.1016/j.bbr.2019.111941.
- [42] Bachtiar V, Near J, Johansen-Berg H, Stagg CJ. Modulation of GABA and resting state functional connectivity by transcranial direct current stimulation. *Elife* 2015;4:1–9. doi:10.7554/eLife.08789.
- [43] Sengpiel F, Blakemore C, Kind PC, Harrad R. Interocular suppression in the visual cortex of strabismic cats. *J Neurosci* 1994;14:6855–71. doi:10.1523/JNEUROSCI.14-11-06855.1994.
- [44] Hensch TK, Li RW, Bavelier D, Levi DM, Dan Y. Removing Brakes on Adult Brain

- Plasticity: From Molecular to Behavioral Interventions. *J Neurosci* 2010.  
doi:10.1523/jneurosci.4812-10.2010.
- [45] Ho K-A, Taylor J, Loo C. P 209. Transcranial random noise stimulation: A new approach to stimulating the brain. *Clin Neurophysiol* 2013. doi:10.1016/j.clinph.2013.04.286.
- [46] Fertonani A, Pirulli C, Miniussi C. Random Noise Stimulation Improves Neuroplasticity in Perceptual Learning. *J Neurosci* 2011. doi:10.1523/jneurosci.2002-11.2011.
- [47] McDonnell MD, Ward LM. The benefits of noise in neural systems: Bridging theory and experiment. *Nat Rev Neurosci* 2011. doi:10.1038/nrn3061.
- [48] van der Groen O, Wenderoth N. Transcranial Random Noise Stimulation of Visual Cortex: Stochastic Resonance Enhances Central Mechanisms of Perception. *J Neurosci* 2016;36.
- [49] Pavan A, Ghin F, Contillo A, Milesi C, Campana G, Mather G. Modulatory mechanisms underlying high-frequency transcranial random noise stimulation (hf-tRNS): A combined stochastic resonance and equivalent noise approach. *Brain Stimul* 2019.  
doi:10.1016/J.BRS.2019.02.018.
- [50] Antal A, Herrmann CS. Transcranial Alternating Current and Random Noise Stimulation: Possible Mechanisms. *Neural Plast* 2016;2016:1–12. doi:10.1155/2016/3616807.
- [51] Gao TY, Guo CX, Babu RJ, Black JM, Bobier WR, Chakraborty A, et al. Effectiveness of a binocular video game vs placebo video game for improving visual functions in older children, teenagers, and adults with amblyopia: A randomized clinical trial. *JAMA Ophthalmol* 2018;136:172–81. doi:10.1001/jamaophthalmol.2017.6090.
- [52] Nitsche MA, Cohen LG, Wassermann EM, Priori A, Lang N, Antal A, et al. Transcranial direct current stimulation: State of the art 2008. *Brain Stimul* 2008.

- doi:10.1016/j.brs.2008.06.004.
- [53] Bikson M, Grossman P, Thomas C, Zannou AL, Jiang J, Adnan T, et al. Safety of Transcranial Direct Current Stimulation: Evidence Based Update 2016. *Brain Stimul* 2016;9:641–61. doi:10.1016/j.brs.2016.06.004.
- [54] Bikson M, Datta A, Elwassif M. Establishing safety limits for transcranial direct current stimulation. *Clin Neurophysiol* 2009;120:1033–4. doi:10.1016/j.clinph.2009.03.018.
- [55] Poreisz C, Boros K, Antal A, Paulus W. Safety aspects of transcranial direct current stimulation concerning healthy subjects and patients. *Brain Res Bull* 2007;72:208–14. doi:10.1016/j.brainresbull.2007.01.004.
- [56] Antal a, Nitsche M a, Paulus W. External modulation of visual perception in humans. *Neuroreport* 2001;12:3553–5. doi:10.1097/00001756-200111160-00036.
- [57] Paneri B, Adair D, Thomas C, Khadka N, Patel V, Tyler WJ, et al. Tolerability of Repeated Application of Transcranial Electrical Stimulation with Limited Outputs to Healthy Subjects. *Brain Stimul* 2016;9:740–54. doi:10.1016/j.brs.2016.05.008.
- [58] Nitsche MA, Liebetanz D, Lang N, Antal A, Tergau F, Paulus W, et al. Safety criteria for transcranial direct current stimulation (tDCS) in humans. *Clin Neurophysiol* 2003;114:2220–2; author reply 2222-3. doi:10.1016/S1388-2457(03)00235-9.
- [59] Bach M. *Optometry and Vision Sciences* ( 1996 ) The “ Freiburg Visual Acuity Test ” – Automatic measurement of visual acuity. *Optom Vis Sci* 1996.
- [60] Bach M. The Freiburg Visual Acuity Test-Variability unchanged by post-hoc re-analysis. *Graefe’s Arch Clin Exp Ophthalmol* 2007. doi:10.1007/s00417-006-0474-4.
- [61] Thompson B, Mansouri B, Koski L, Hess RF. From motor cortex to visual cortex: The application of noninvasive brain stimulation to amblyopia. *Dev Psychobiol* 2012;54:263–

73. doi:10.1002/dev.20509.
- [62] Bocci T, Nasini F, Caleo M, Restani L, Barloscio D, Ardolino G, et al. Unilateral Application of Cathodal tDCS Reduces Transcallosal Inhibition and Improves Visual Acuity in Amblyopic Patients. *Front Behav Neurosci* 2018;12:1–9. doi:10.3389/fnbeh.2018.00109.
- [63] Terney D, Chaieb L, Moliadze V, Antal A, Paulus W. Increasing Human Brain Excitability by Transcranial High-Frequency Random Noise Stimulation. *J Neurosci* 2008;28:14147–55. doi:10.1523/JNEUROSCI.4248-08.2008.
- [64] van der Groen O, Mattingley JB, Wenderoth N. Altering brain dynamics with transcranial random noise stimulation. *Sci Rep* 2019. doi:10.1038/s41598-019-40335-w.
- [65] Herpich F, Melnick M, Huxlin K, Tadin D, Agosta S, Battelli L. Transcranial Random Noise Stimulation Enhances Visual Learning In Healthy Adults. *J Vis* 2015. doi:10.1167/15.12.40.
- [66] van Koningsbruggen MG, Ficarella SC, Battelli L, Hickey C. Transcranial random-noise stimulation of visual cortex potentiates value-driven attentional capture. *Soc Cogn Affect Neurosci* 2016;11:1481–8. doi:10.1093/scan/nsw056.
- [67] Chaieb L, Antal A, Paulus W. Transcranial random noise stimulation-induced plasticity is NMDA-receptor independent but sodium-channel blocker and benzodiazepines sensitive. *Front Neurosci* 2015. doi:10.3389/fnins.2015.00125.
